# Supplementary material for: The Role of Biophilic Agents in Building a Green Resilient City; the Case of Birmingham, UK
Source: MDPI journal article supplement (doi:10.3390/su13095033), 2021-04-30
Supplement: s1 [file s1]

## **SUPPLEMENTARY MATERIAL | Interview guide and questions**

First, I introduce myself and my research to the interviewee. Then I explain the interview process – duration, questions, confidentiality and reproduction. Interviewee will be informed by the researcher about the recording of the interview beforehand. In case the interviewee will disagree with the recording, only notes will be taken. The interviewee is made aware of the fact that the recording will be transcribed and sent to her/him for approval before the data analysis. Also,

Questions for the interviewee:

- 1 Are you aware of biophilic approach in Birmingham? How do you define it?
  - If Yes, proceed to Q2
  - If No, explain biophilic and then proceed to Q2
- 2 Do you know about the different dimensions of biophilic approach (system, agents, institutions)?
- 3 Which agents can you identify within the biophilic approach in Birmingham (private, public, community, individuals)?
- 4 How do the different biophilic agents interact in the city?
- 5 What is the purpose (aim) of biophilic approach in urban planning in Birmingham?
- 6 Does the biophilic approach, currently, consider climate resilience plans?
- 7 Do the climate resilience actions in urban planning involve biophilic approach?
- 8 What roles do citizens play in this approach?
- 9 What role do other agents play?
- 10 What is the relation between government and other actors (agents) in Birmingham?
